# Supplementary material
Source: publisher site journal article supplement (http://www.spandidos-publications.com/3219/downloadSupplementary)

Figure S1. Association between SMARCC2 expression and the overall survival time of patients with LGG and GBM. Data from TCGA dataset were used to analyze the survival of patients with (A) LGG and (B) GBM with high or low SMARCC2 expression. LGG, low-grade glioma; GBM, glioblastoma; SMARCC2, SWItch/sucrose non-fermentable related, matrix associated, actin dependent regulator of chromatin subfamily c member 2; TCGA, The Cancer Genome Atlas.

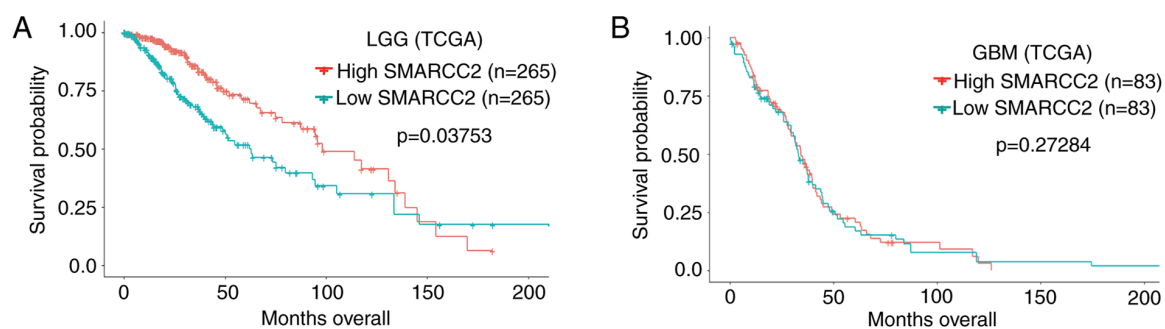

Supplement: Supplementary file 1 [file downloadSupplementary]
